# Supplementary material for: Role of Reactive Thrombocytosis After Primary Cytoreductive Surgery in Advanced Ovarian Cancer
Source: Research Square preprint supplement (doi:10.21203/rs.3.rs-445664/v1), 2021-05-04
Supplement: Supplementary file 1 [file e65f1484fc479778b9bede9d.docx]

**Supplementary table 1.** Logistic regression analysis of attributing factors for the thrombocytosis at 5th cycle

|  | | B | S.E. | Wald | df | Sig. | Exp(B) | 95% C.I, for EXP(B) | |
| --- | --- | --- | --- | --- | --- | --- | --- | --- | --- |
| Lower | Upper |
| 1st cycle of chemotherapy | Age | -0.019 | 0.019 | 1.062 | 1 | 0.303 | 0.981 | 0.946 | 1.018 |
| Thrombocytosis, before surgery | 0.818 | 0.391 | 4.381 | 1 | 0.036 | 2.266 | 1.053 | 4.875 |
| TTC | -0.022 | 0.023 | 0.918 | 1 | 0.338 | 0.978 | 0.935 | 1.023 |
| Stage | 0.572 | 0.428 | 1.783 | 1 | 0.182 | 1.771 | 0.765 | 4.099 |
| CA-125 | 0.000 | 0.000 | 1.434 | 1 | 0.231 | 1.000 | 1.000 | 1.000 |
| Splenectomy | 2.424 | 0.395 | 37.747 | 1 | 0.000 | 11.293 | 5.211 | 24.473 |
| No gross residual |  |  | 5.671 | 2 | 0.059 |  |  |  |
| 1-9 mm | 1.121 | 0.481 | 5.447 | 1 | 0.020 | 3.069 | 1.197 | 7.872 |
| Equal to or mor than 10 mm | 0.843 | 0.495 | 2.898 | 1 | 0.089 | 2.322 | 0.880 | 6.126 |
| Constant | -2.675 | 1.026 | 6.803 | 1 | 0.009 | 0.069 |  |  |
| 5th cycle | Thrombocytosis, before surgery | 0.693 | 0.375 | 3.413 | 1 | 0.065 | 2.000 | 0.959 | 4.173 |
| Splenectomy | 2.283 | 0.369 | 38.181 | 1 | <0.001 | 9.804 | 4.753 | 20.223 |
| No gross residual |  |  | 5.047 | 2 | 0.080 |  |  |  |
| 1-9 mm | 1.039 | 0.465 | 4.991 | 1 | 0.025 | 2.827 | 1.136 | 7.034 |
| Equal to or mor than 10 mm | 0.665 | 0.466 | 2.039 | 1 | 0.153 | 1.944 | 0.781 | 4.841 |
| Constant | -3.872 | 0.413 | 88.118 | 1 | 0.000 | 0.021 |  |  |

Thrombocytosis was defined as platelet count ≥ 3.5 x 105/mm3

*B* beta coefficients, *S.E* standard errors, *Wald* wald statistic, *Df* degress of freedom, *Sig* significance level, *Exp(B)* exponentiation of the beta coefficients, *CI* confidential interval, *CA-125* Cancer antigen 125, *TTC* Time from surgery to the first cycle of chemotherapy
